# Supplementary material for: Can large magnetic anisotropy and high spin really coexist?
Source: Royal Society of Chemistry journal article supplement (doi:10.1039/b714715e), 2007-11-07
Supplement: b714715e.pdf [file b714715e.pdf]

**Table S1.** D, S and energy barrier values for ferromagnetically coupled SMMs.

| Compound                                                                                                                                                           | S    | D/ cm <sup>-1</sup> | Barrier/cm <sup>-1</sup> | ref. |
|--------------------------------------------------------------------------------------------------------------------------------------------------------------------|------|---------------------|--------------------------|------|
| [Mn <sub>3</sub> O(O <sub>2</sub> CMe) <sub>3</sub> (mpko) <sub>3</sub> ](ClO <sub>4</sub> )·3CH <sub>2</sub> Cl <sub>2</sub>                                      | 6    | -0.34               | 12.2                     | 1    |
| [Mn <sub>3</sub> (Hcht) <sub>2</sub> (bpy) <sub>4</sub> ](ClO <sub>4</sub> ) <sub>2</sub>                                                                          | 7    | -0.10               | 4.9                      | 2    |
| [Ni <sub>4</sub> (hmp) <sub>4</sub> (CH <sub>3</sub> OH) <sub>4</sub> Cl <sub>4</sub> ]                                                                            | 4    | -0.60               | 9.6                      | 3    |
| [Ni <sub>4</sub> (H <sub>2</sub> thme) <sub>4</sub> (MeCN) <sub>4</sub> ](NO <sub>3</sub> ) <sub>4</sub>                                                           | 4    | -0.43               | 6.9                      | 4    |
| [Mn <sub>4</sub> Cl <sub>4</sub> sal <sub>4</sub> ]                                                                                                                | 8    | -0.10               | 6.4                      | 5    |
| [Fe <sub>4</sub> (sae) <sub>4</sub> (MeOH) <sub>4</sub> ]                                                                                                          | 8    | -0.64               | 41.0                     | 6    |
| [Mn <sub>4</sub> (O <sub>2</sub> CMe) <sub>2</sub> (pdmH) <sub>6</sub> ](ClO <sub>4</sub> ) <sub>2</sub>                                                           | 9    | -0.32               | 25.9                     | 7    |
| (NEt <sub>4</sub> ) <sub>3</sub> [Mn <sub>5</sub> O(salox) <sub>3</sub> (N <sub>3</sub> ) <sub>6</sub> Cl <sub>2</sub> ]                                           | 11   | -0.22               | 26.6                     | 8    |
| (NMe <sub>4</sub> ) <sub>3</sub> Na[Co <sub>6</sub> (cit) <sub>4</sub> (H <sub>2</sub> O) <sub>10</sub> ]                                                          | 3    | -0.61               | 5.5                      | 9    |
| [Mn <sub>6</sub> O <sub>2</sub> (Etsao) <sub>6</sub> (O <sub>2</sub> CPh(Me) <sub>2</sub> ) <sub>2</sub> (EtOH) <sub>6</sub> ]                                     | 12   | -0.43               | 61.9                     | 10   |
| [Ni <sub>8</sub> Na <sub>2</sub> (N <sub>3</sub> ) <sub>12</sub> (BuPhCO <sub>2</sub> ) <sub>2</sub> (mpo) <sub>4</sub> (Hmpo) <sub>6</sub> (EtOAc) <sub>6</sub> ] | 8    | -0.07               | 4.5                      | 11   |
| Ce[Mn <sub>8</sub> O <sub>8</sub> (O <sub>2</sub> CMe) <sub>12</sub> (H <sub>2</sub> O) <sub>4</sub> ]                                                             | 16   | -0.10               | 25.6                     | 12   |
| [Mn <sub>8</sub> O <sub>2</sub> (OH) <sub>2</sub> (OMe) <sub>12</sub> (OAc) <sub>2</sub> (Mesalim) <sub>4</sub> ]                                                  | 8    | -0.39               | 25.0                     | 13   |
| [Mn <sub>10</sub> O <sub>4</sub> (N <sub>2</sub> ) <sub>4</sub> (hmp) <sub>12</sub> ](MeCN) <sub>2</sub>                                                           | 22   | -0.01               | 4.8                      | 14   |
| [Ni <sub>12</sub> (chp) <sub>12</sub> (O <sub>2</sub> CMe) <sub>12</sub> (thf) <sub>6</sub> (H <sub>2</sub> O) <sub>6</sub> ]                                      | 12   | -0.05               | 7.2                      | 15   |
| [Mn <sub>19</sub> O <sub>8</sub> (OH) <sub>4</sub> (N <sub>3</sub> ) <sub>8</sub> (LH) <sub>12</sub> (MeCN) <sub>6</sub> Cl <sub>2</sub>                           | 83/2 | -0.005              | 8.6                      | 16   |

## References

- 1 T. C. Stamatatos, D. Foguet-Albiol, C. C. Stoumpos, C. P. Raptopoulou, A. Terzis, W. Wernsdorfer, S. P. Perlepes, G. Christou, *J. Am. Chem. Soc.* 2005, **127**, 15380.
- 2 R. T. W. Scott, S. Parsons, M. Murugesu, W. Wernsdorfer, G. Christou, E. K. Brechin, *Chem. Commun.* 2005, 2083.
- 3 E.-C. Yang, W. Wernsdorfer, L. N. Zakharov, Y. Karaki, A. Yamaguchi, R. M. Isidro, G.-D. Lu, S. A. Wilson, A. L. Rheingold, H. Ishimoto, D. N. Hendrickson, *Inorg. Chem.* 2006, **45**, 529.
- 4 M. Moragues-Cánovas, M. Helliwell, L. Ricard, E. Rivière, W. Wernsdorfer, E. K. Brechin, T. Mallah, *Eur. J. Inorg. Chem.* 2004, 2219.
- 5 C. Boskovic, R. Bircher, P. L. W. Tregenna-Piggott, H. U. Güdel, C. Paulsen, W. Wernsdorfer, A. L. Barra, E. Khatsko, E. Neels, H. Stoeckli-Evans, *J. Am. Chem. Soc.* 2003, **125**, 14046.
- 6 H. Oshio, N. Hoshino, T. Ito, M. Nakano, *J. Am. Chem. Soc.* 2004, **126**, 8805.
- 7 J. Yoo, E. K. Brechin, A. Yamaguchi, M. Nakano, J. C. Huffman, A. L. Maniero, L. C. Brunel, K. Awaga, H. Ishimoto, G. Christou, D. N. Hendrickson, *Inorg. Chem.* 2000, **39**, 3615.
- 8 C.-Y. Yang, W. Wernsdorfer, G.-H. Lee, H.-L. Tsai, *J. Am. Chem. Soc.*, 2007, **129**, 456.
- 9 M. Murrie, S. J. Teat, H. Stoeckli-Evans, H. U. Güdel, H. U. *Angew. Chem. Int. Ed.* 2003, **42**, 4653.
- 10 C. Milios, A. Vinslava, W. Wernsdorfer, S. Moggach, S. Parsons, S. Perlepes, G. Christou, E. K. Brechin, *J. Am. Chem. Soc.* 2007, **129**, 2754.
- 11 A. Bell, G. Aromí, S. J. Teat, W. Wernsdorfer, R. E. P. Winpenny, *Chem. Commun.*, 2005, 2808.
- 12 A. J. Tasiopoulos, W. Wernsdorfer, B. Moulton, J. Zaworotko, G. Christou, *J. Am. Chem. Soc.* 2003, **125**, 15274.
- 13 M. D. Godbole, O. Roubeau, A. M. Mills, H. Kooijman, A. L. Spek, E. Bouwman, *Inorg. Chem.*, 2006, **45**, 6713.
- 14 T. C. Stamatatos, K. A. Abboud, W. Wernsdorfer, G. Christou, *Angew. Chem. Int. Ed.* 2006, **45**, 4134.
- 15 A. J. Blake, C. M. Grant, S. Parsons, J. M. Rawson, R. E. P. Winpenny, *J. Chem. Soc.-Chem. Commun.* 1994, 2363.
- 16 A. Ako, I. J. Hewitt, V. Mereacre, R. Clérac, W. Wernsdorfer, C. E. Anson, A. K. Powell, *Angew. Chem. Int. Ed.* 2006, **45**, 4926.
